# Supplementary material
Source: PubMed Central journal article supplement (PMC9709058)
Supplement: 41467_2022_35050_MOESM1_ESM.pdf [file 41467_2022_35050_MOESM1_ESM.pdf]

## Supplementary Information

# Reactive Metal Boride Nanoparticles Trap Lipopolysaccharide and Peptidoglycan for Bacteria-Infected Wound Healing

Yun Meng<sup>1,2#</sup>, Lijie Chen<sup>2#</sup>, Yang Chen<sup>1,3#</sup>, Jieyun Shi<sup>1</sup>, Zheng Zhang<sup>4</sup>, Yiwen Wang<sup>4</sup>, Fan Wu<sup>2</sup>, Xingwu Jiang<sup>2</sup>, Wei Yang<sup>1</sup>, Li Zhang<sup>1</sup>, Chaochao Wang<sup>1</sup>, Xianfu Meng<sup>1</sup>, Yelin Wu<sup>1\*</sup>, Wenbo Bu<sup>1,2\*</sup>

<sup>1</sup>Tongji University Cancer Center, Shanghai Tenth Peoples Hospital, Tongji University School of Medicine, Shanghai 200072, P. R. China

<sup>2</sup>Department of Materials Science and State Key Laboratory of Molecular Engineering of Polymers, Fudan University, Shanghai 200433, P. R. China

<sup>3</sup>School of Life Sciences and Technology, Tongji University, Shanghai 200092, P. R. China

<sup>4</sup>School of life Science, East China Normal University, Shanghai 200241, P. R. China

<sup>#</sup>These authors contributed equally to this work.

**Email:** sk\_wuyelin@tongji.edu.cn; wbbu@fudan.edu.cn;

Supplementary Information:

Supplementary Figures 1-23

Supplementary Tables 1, 2, 3

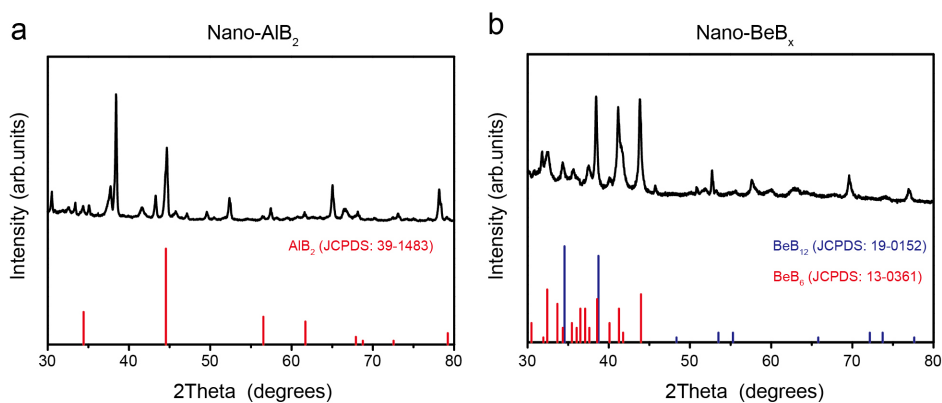

**Supplementary Fig. 1** XRD patterns of **a**, Nano-AlB<sub>2</sub> and **b**, Nano-BeB<sub>x</sub>. Source data are provided as a Source Data file.

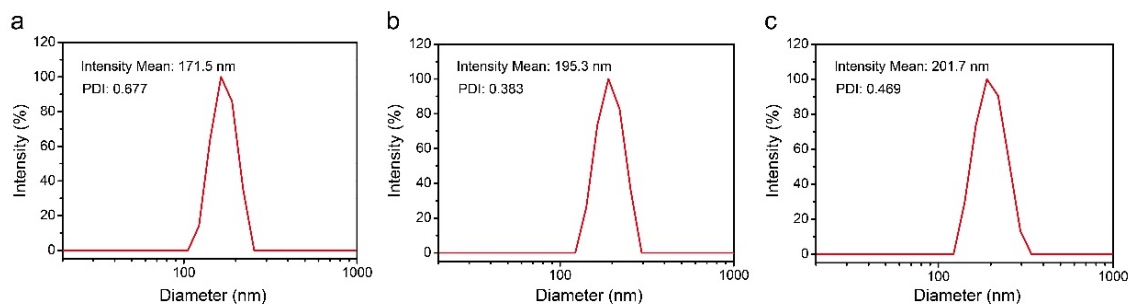

**Supplementary Fig. 2** Particle size analysis of **a**, Nano-MgB<sub>2</sub>, **b**, Nano-AlB<sub>2</sub> and **c**, Nano-BeB<sub>x</sub>. Source data are provided as a Source Data file.

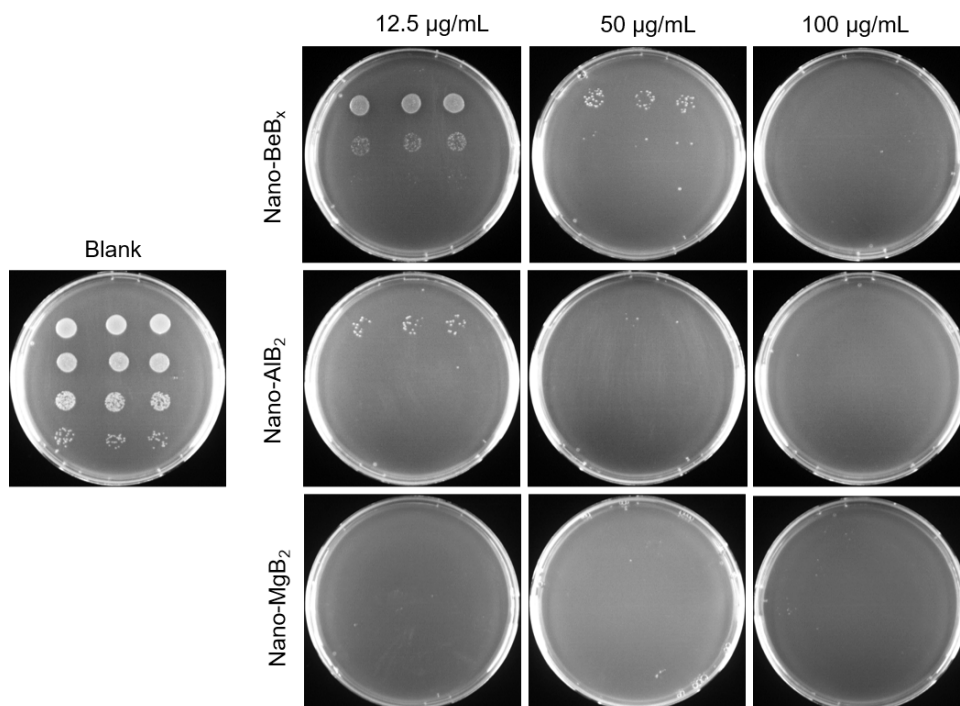

**Supplementary Fig. 3** Antibacterial activity of Nano-MgB<sub>2</sub>, Nano-AlB<sub>2</sub> and Nano-BeB<sub>x</sub>. *P. aeruginosa* treated with different concentrations of Nano-MgB<sub>2</sub>, Nano-AlB<sub>2</sub> and Nano-BeB<sub>x</sub> (n=3 biological independent cells).

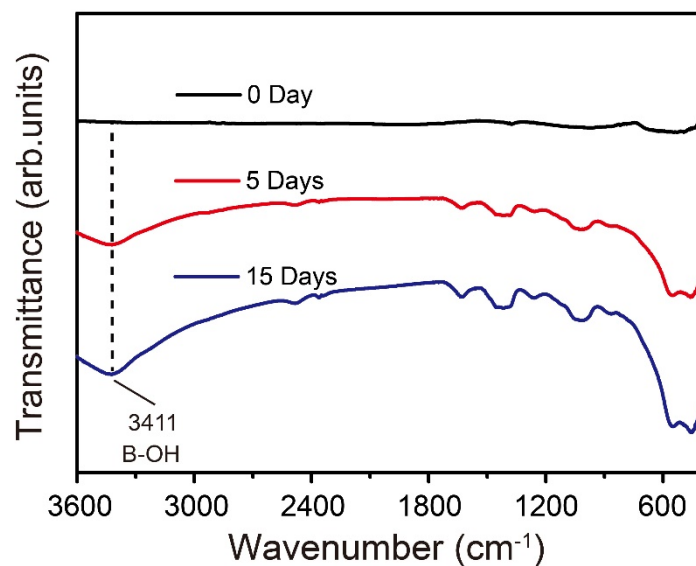

**Supplementary Fig. 4** FTIR spectrum analysis of the hydrolysis process of Nano-MgB<sub>2</sub> in 15 days. Source data are provided as a Source Data file.

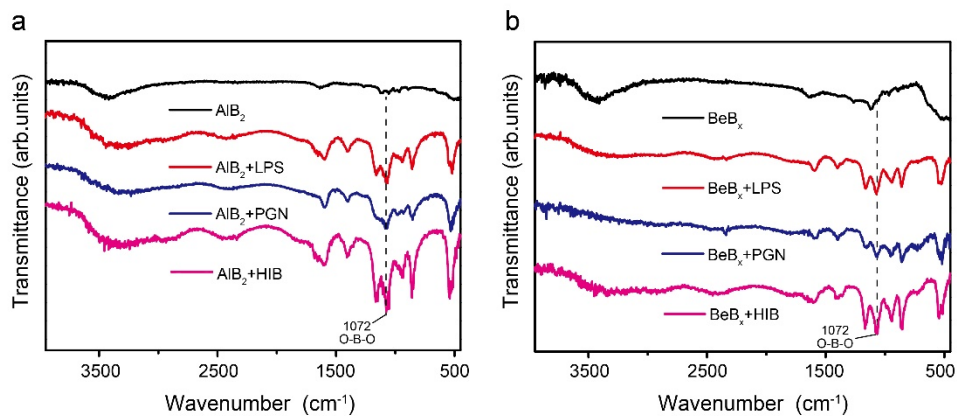

**Supplementary Fig. 5** FTIR spectra of O-B-O of **a**, Nano-AlB<sub>2</sub> and **b**, Nano-BeB<sub>x</sub> incubated with LPS, PGN, and HIB, respectively. Source data are provided as a Source Data file.

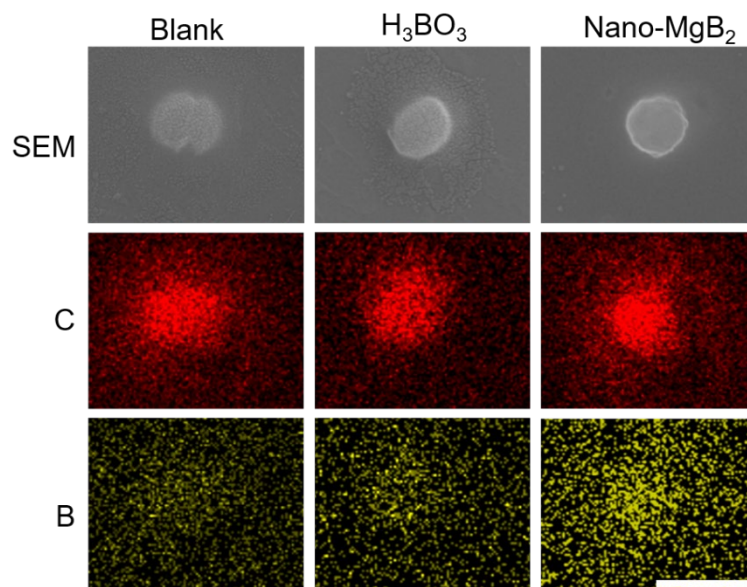

**Supplementary Fig. 6** Elemental mapping of *S. aureus* incubated with  $\text{H}_3\text{BO}_3$  and Nano- $\text{MgB}_2$  for 3 h (scale bar=500 nm). Data are representative of at least three independent experiments with similar results.

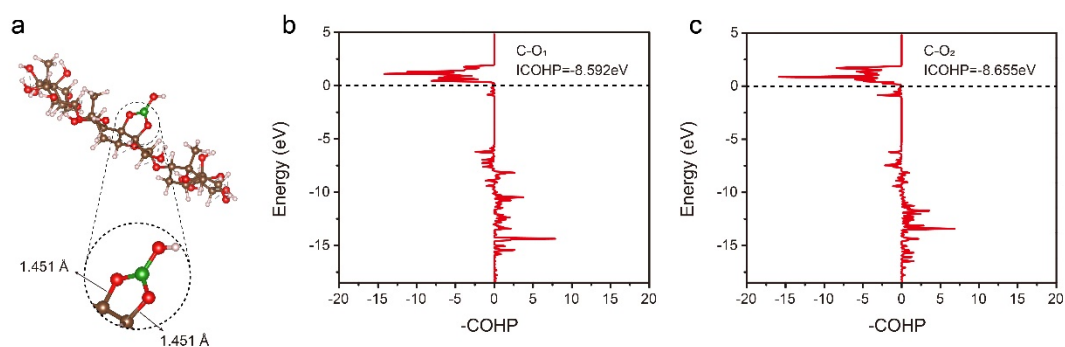

**Supplementary Fig. 7** Theoretical simulation for the  $\text{H}_3\text{BO}_3$ -saccharide complexation. **a**, DFT calculations and **b-c**, COHP analysis of C-O<sub>1</sub>, C-O<sub>2</sub> bond interactions corresponding to the complexation of  $\text{H}_3\text{BO}_3$  with the 3, 4-o-hydroxyl groups of bicyclic monosaccharide structure. Source data are provided as a Source Data file.

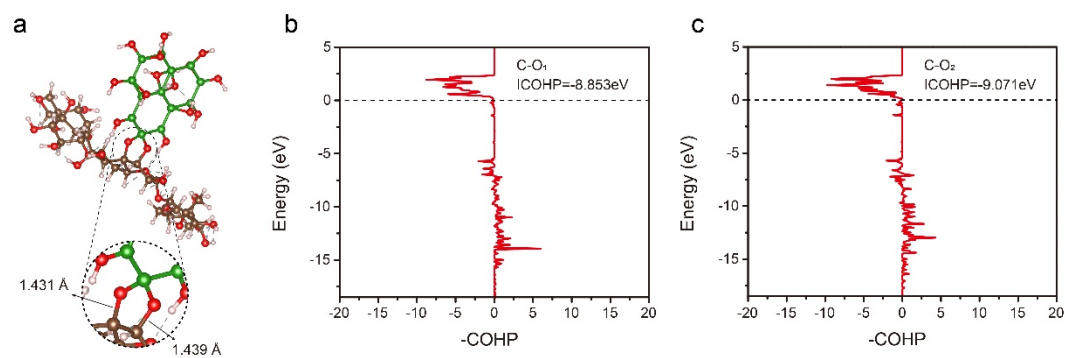

**Supplementary Fig. 8** Theoretical simulation for the Nano-MgB<sub>2</sub>-saccharide complexation. **a**, DFT calculations and **b-c**, COHP analysis of C-O<sub>1</sub>, C-O<sub>2</sub> bond interactions corresponding to the complexation of hydrolysate of Nano-MgB<sub>2</sub> with the 3, 4-o-hydroxyl groups of bicyclic monosaccharide structure. Source data are provided as a Source Data file.

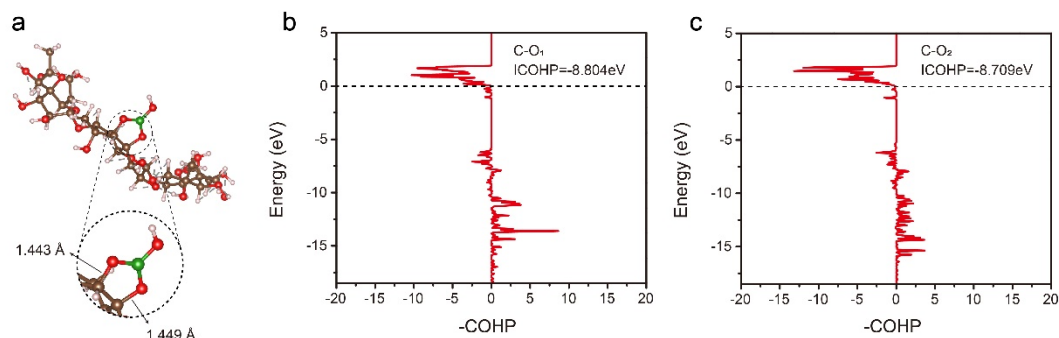

**Supplementary Fig. 9** Theoretical simulation for the H<sub>3</sub>BO<sub>3</sub>-saccharide complexation. **a**, DFT calculations and **b-c**, COHP analysis of C-O<sub>1</sub>, C-O<sub>2</sub> bond interactions corresponding to the complexation of H<sub>3</sub>BO<sub>3</sub> with the 4, 5-o-hydroxyl groups of bicyclic monosaccharide structure. Source data are provided as a Source Data file.

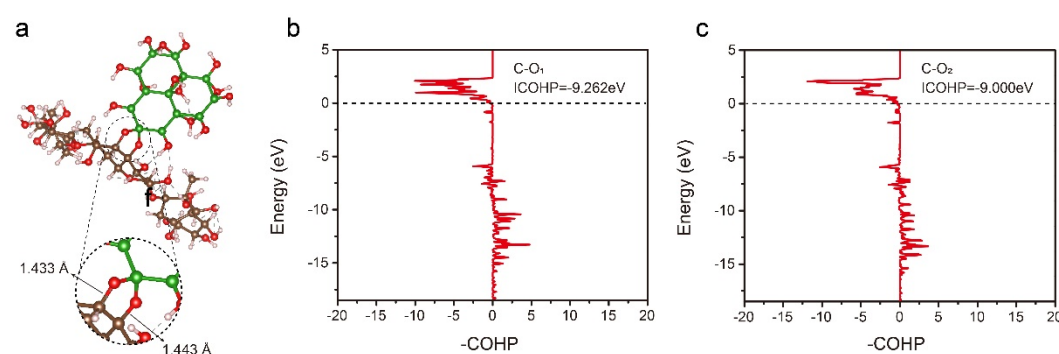

**Supplementary Fig. 10** Theoretical simulation for the Nano-MgB<sub>2</sub>-saccharide complexation. **a**, DFT calculations and **b-c**, COHP analysis of C-O<sub>1</sub>, C-O<sub>2</sub> bond interactions corresponding to the complexation of hydrolysate of Nano-MgB<sub>2</sub> with the 3, 4-o-hydroxyl groups of bicyclic monosaccharide structure. Source data are provided as a Source Data file.

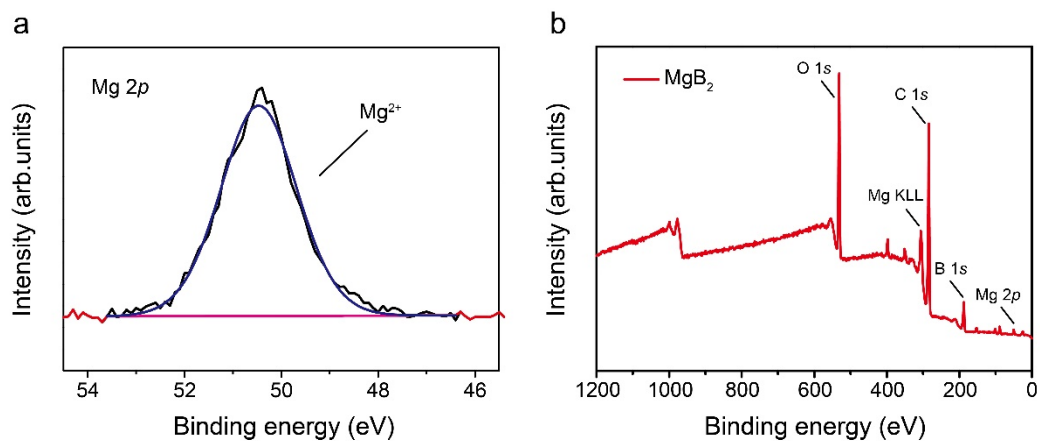

**Supplementary Fig. 11** XPS characterization of Nano-MgB<sub>2</sub>. **a**, XPS fine spectra of Mg 2*p* signal and **b**, XPS survey spectra of Nano-MgB<sub>2</sub> deconvoluted by the multi-Gaussian function.

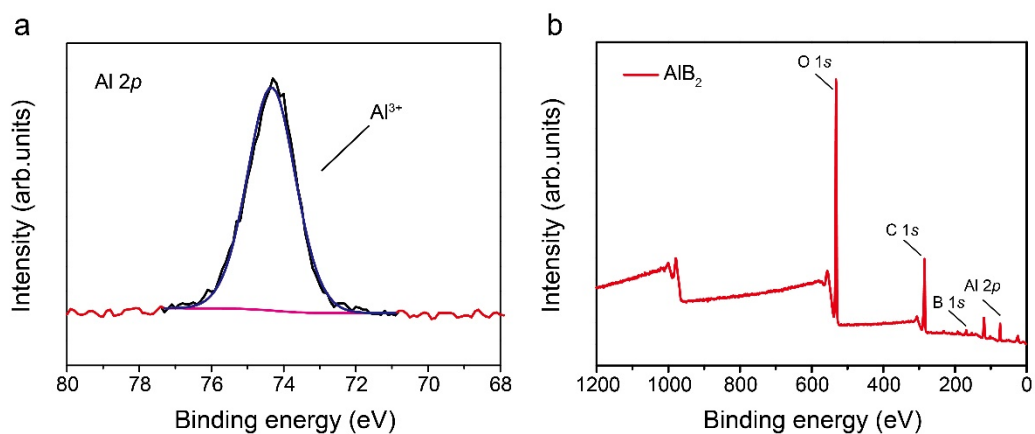

**Supplementary Fig. 12** XPS characterization of Nano-AlB<sub>2</sub>. **a**, XPS fine spectra of Al 2*p* signal and **b**, XPS survey spectra of Nano-AlB<sub>2</sub> deconvoluted by the multi-Gaussian function.

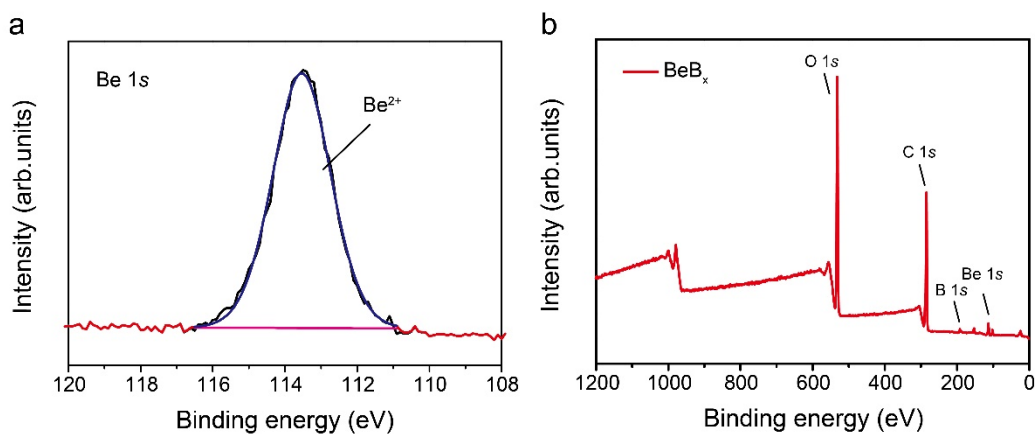

**Supplementary Fig. 13** XPS characterization of Nano-BeB<sub>x</sub>. **a**, XPS fine spectra of Be 1*s* signal

and **b**, XPS survey spectra of Nano-BeB<sub>x</sub> deconvoluted by the multi-Gaussian function.

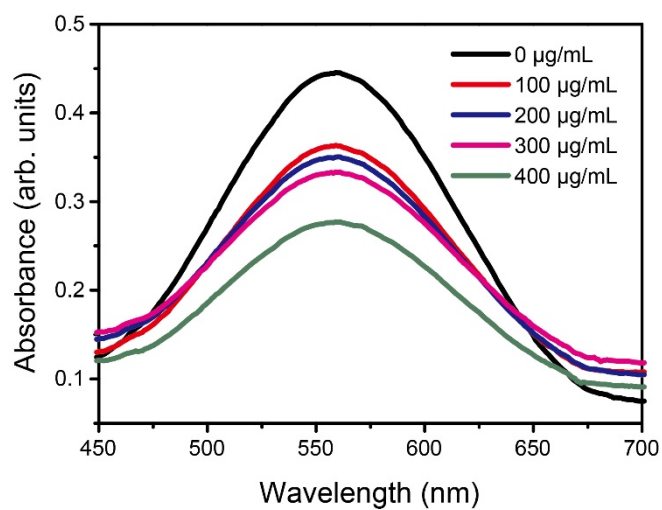

**Supplementary Fig. 14** UV-vis spectra of PTIO• scavenging ability with different concentrations of Nano-MgB<sub>2</sub>. Data are representative of at least three independent experiments. Source data are provided as a Source Data file.

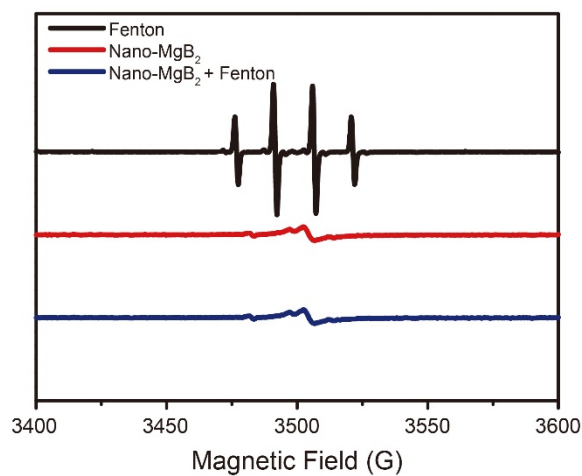

**Supplementary Fig. 15** ESR spectra of Nano-MgB<sub>2</sub> under different conditions. Source data are provided as a Source Data file.

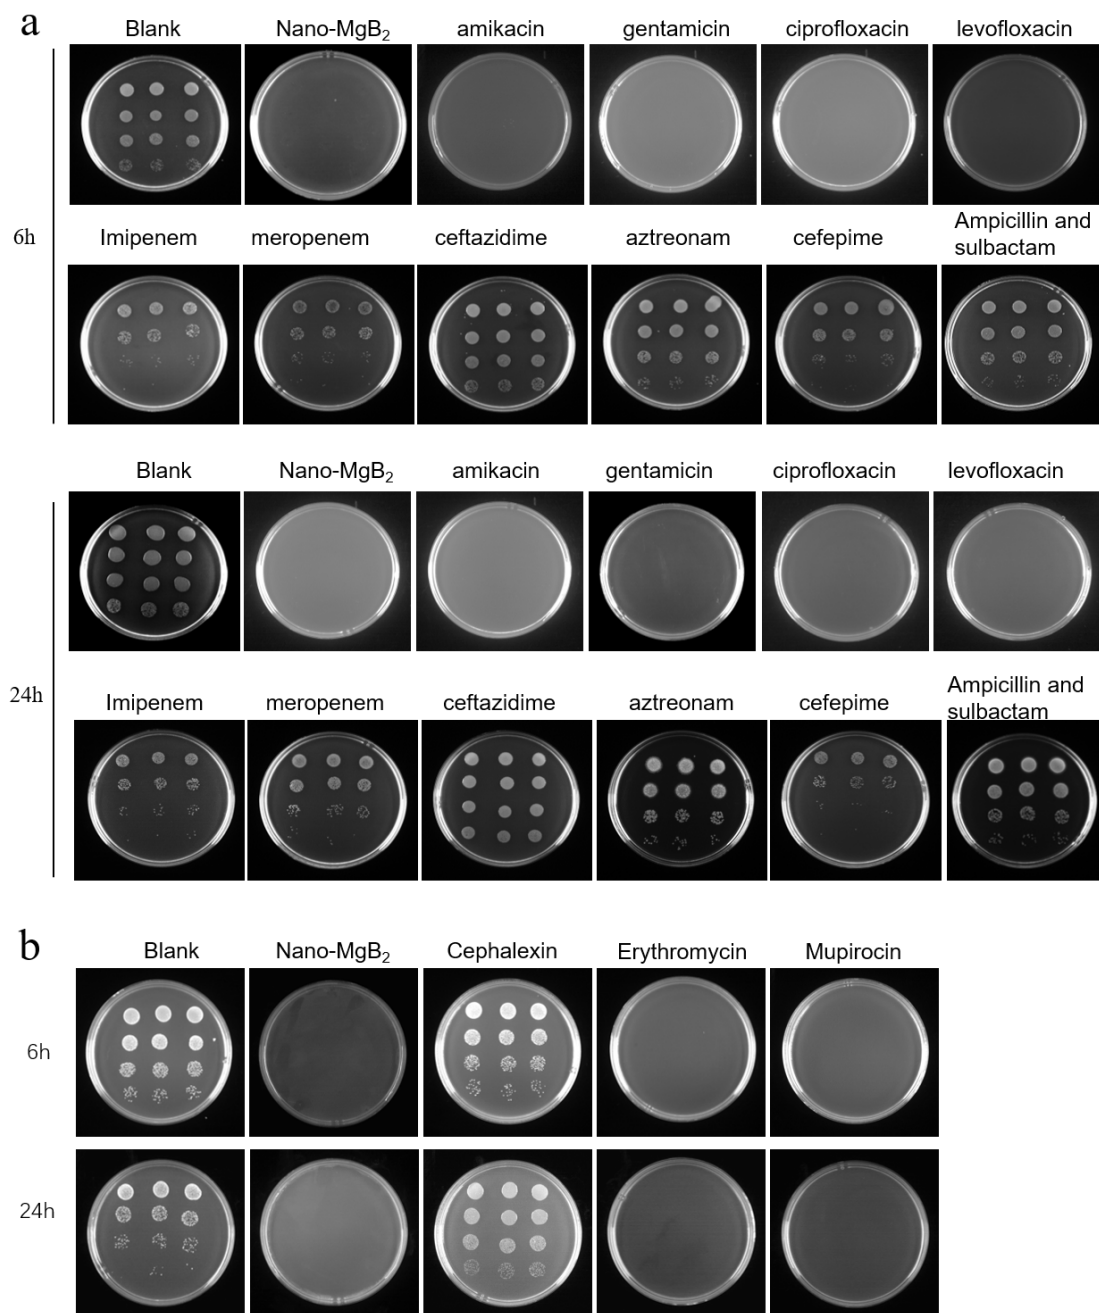

**Supplementary Fig. 16** Antibacterial activity of Nano-MgB<sub>2</sub> and antibiotics. **a**, *P. aeruginosa* treated with Nano-MgB<sub>2</sub> (12.5 µg/mL) and different kinds of antibiotics (16 µg/mL) for 6 h and 24 h. **b**, *S. aureus* treated with Nano-MgB<sub>2</sub> (1 mg/mL) and different kinds of antibiotics (1 mg/mL) for 6 h and 24 h (n=3 biological independent cells).



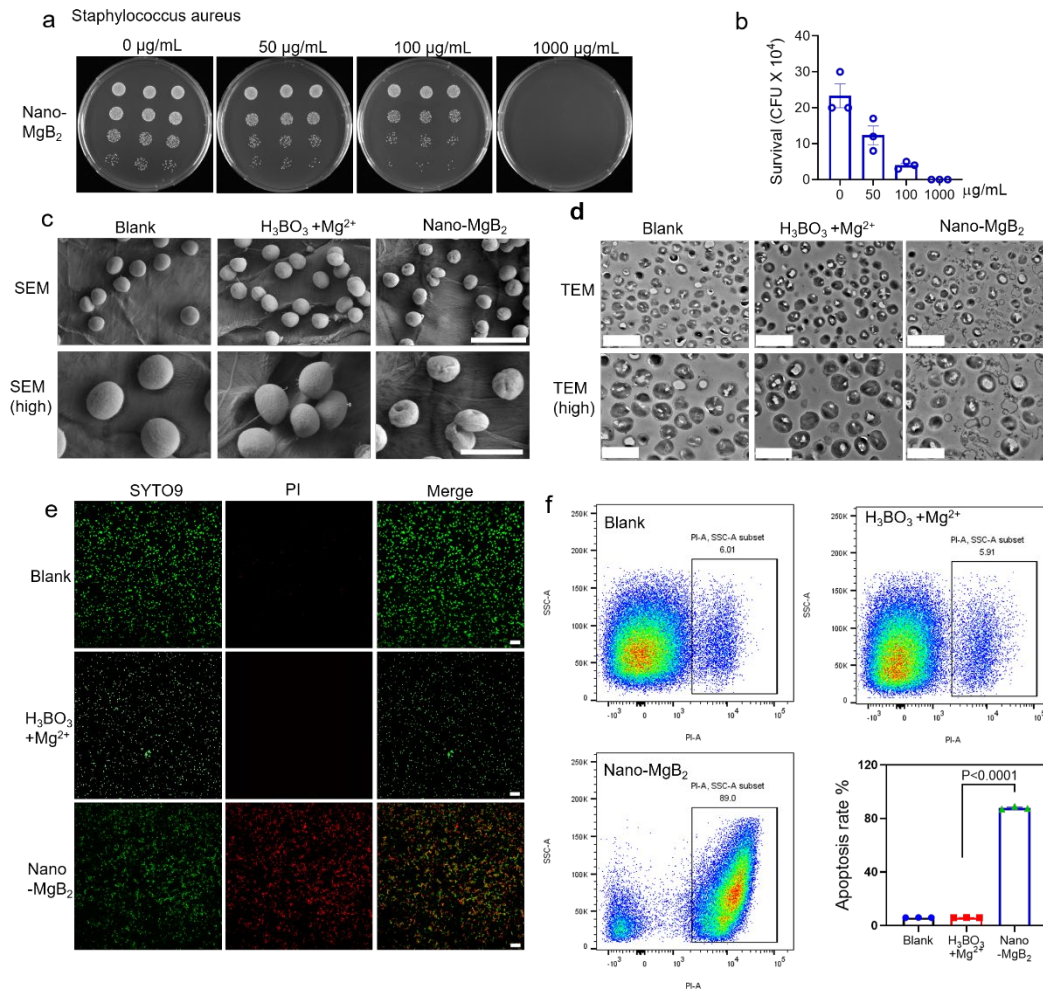

**Supplementary Fig. 17** Antibacterial activity of Nano-MgB<sub>2</sub> against *S. aureus*. **a**, *S. aureus* treated with different concentrations of Nano-MgB<sub>2</sub> using colony-forming units counting method. **b**, Survival rates of *S. aureus* taken as in (a) (n=3 biologically independent cell). **c**, SEM images of *S. aureus* subjected to Nano-MgB<sub>2</sub> and H<sub>3</sub>BO<sub>3</sub>+Mg<sup>2+</sup> Scale bar (up)=2 µm, scale bar (down)=1 µm. **d**, TEM images of *S. aureus* subjected to Nano-MgB<sub>2</sub> and H<sub>3</sub>BO<sub>3</sub>+Mg<sup>2+</sup>. Scale bar (up)=2 µm, scale bar (down)=1 µm. **e**, Cell membrane permeability of *S. aureus* treated with Nano-MgB<sub>2</sub> (500 µg/mL) and H<sub>3</sub>BO<sub>3</sub>+Mg<sup>2+</sup> by SYTO9 and PI staining. All cells were labelled by the membrane-permeable SYTO9 (green), whereas only cells with damaged membrane were positive for PI (red). Scale bar=20 µm. **f**, FACS analysis of PI-positive bacteria treated as in (e) (n=3 biologically independent cells). Data are representative of at least three independent experiments with similar results. Values are the mean ± SEM, one-way ANOVA with Bonferroni post-test was used to analyze multiple groups. Source data are provided as a Source Data file.

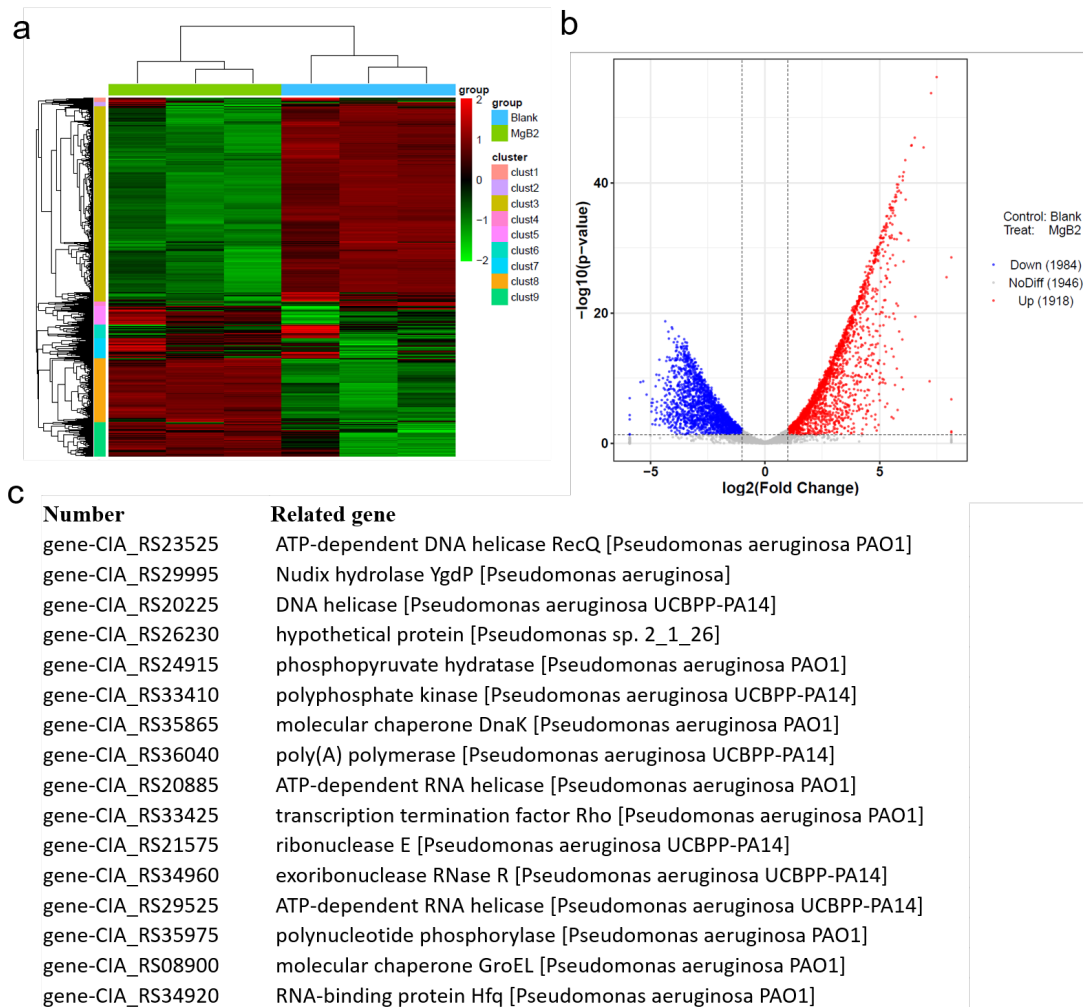

**Supplementary Fig. 18.** RNA seq of *P. aeruginosa* treated with Nano-MgB<sub>2</sub>. **a**, Heat map of differential expressed genes after *P. aeruginosa* treated with Nano-MgB<sub>2</sub>. **b**, Volcano plots comparing gene expression after *P. aeruginosa* treated with Nano-MgB<sub>2</sub>. The P values were calculated using the negative binomial distribution. **c**, The related gene name of Fig 4j.

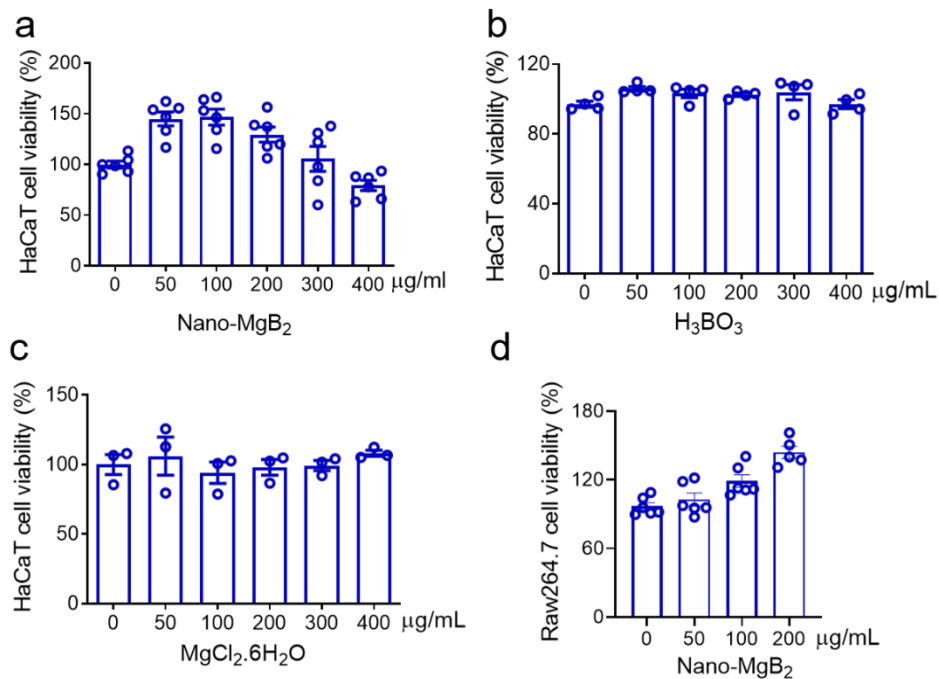

**Supplementary Fig. 19** Biocompatibility of Nano-MgB<sub>2</sub>. **a-c**, HaCaT cells treated with different concentrations of Nano-MgB<sub>2</sub> (n=6 biologically independent cells), H<sub>3</sub>BO<sub>3</sub> (n=4 biologically independent cells) and MgCl<sub>2</sub> (n=3 biologically independent cells). **d**, Raw 264.7 cells treated with different concentrations of Nano-MgB<sub>2</sub> (n=5 biologically independent cells). Data are representative of at least three independent experiments with similar results. Values are the mean ± SEM. Source data are provided as a Source Data file.

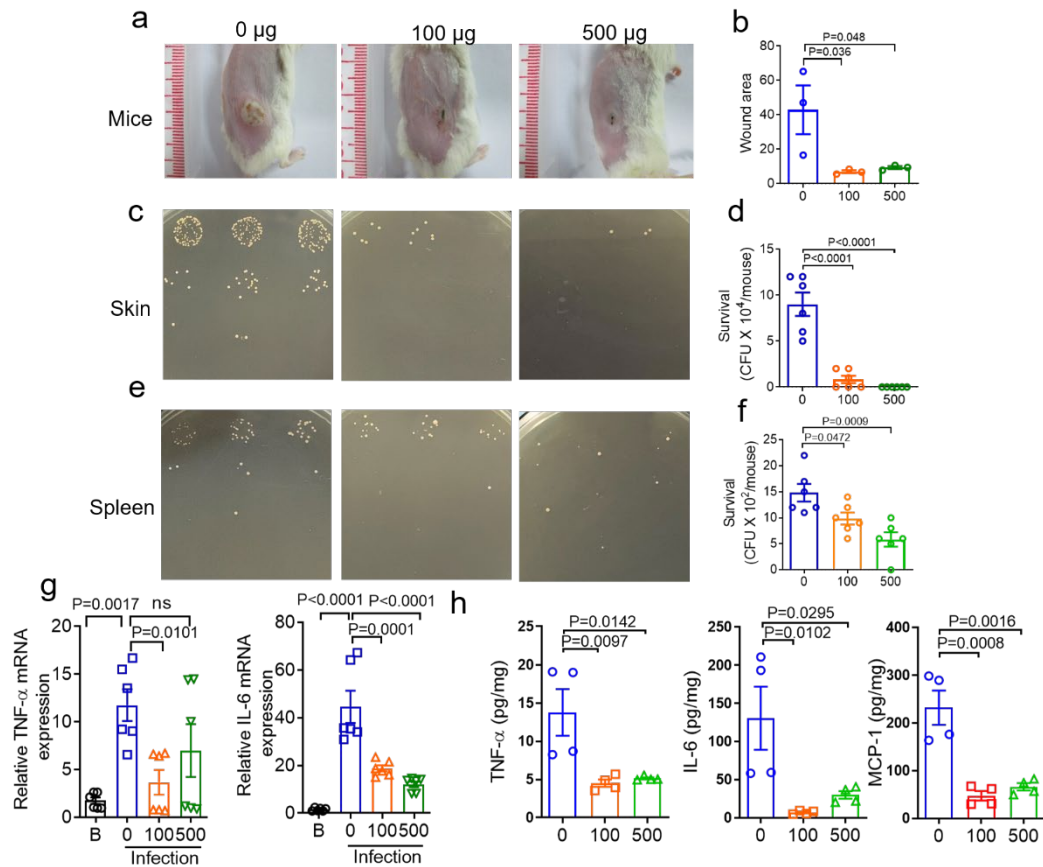

**Supplementary Fig. 20** Nano-MgB<sub>2</sub> inhibited *S. aureus*-induced skin infection and inflammation. **a**, Photographs of *S. aureus*-infected mouse skin treated with or without 100 µg and 500 µg/mouse Nano-MgB<sub>2</sub> (n=3 biologically independent mice). **b**, The wound healing rate of mice treated as in (a) (n=3 biologically independent mice). **c, d**, Survival of bacteria from *S. aureus*-infected mouse skin or (e, f,) spleen taken as in (a) (n=6 biologically independent mice). **g**, QPCR of TNF-α and IL-6 in *S. aureus*-infected mouse skin taken as in (a) (n=6 biologically independent mice). **h**, TNF-α, IL-6 and MCP-1 protein expression in *S. aureus*-infected mouse skin taken as in (a) (n=4 biologically independent mice). Data are representative of at least three independent experiments with similar results. Values are the mean ± SEM, one-way ANOVA with Bonferroni post test was used to analyze multiple groups. Source data are provided as a Source Data file.

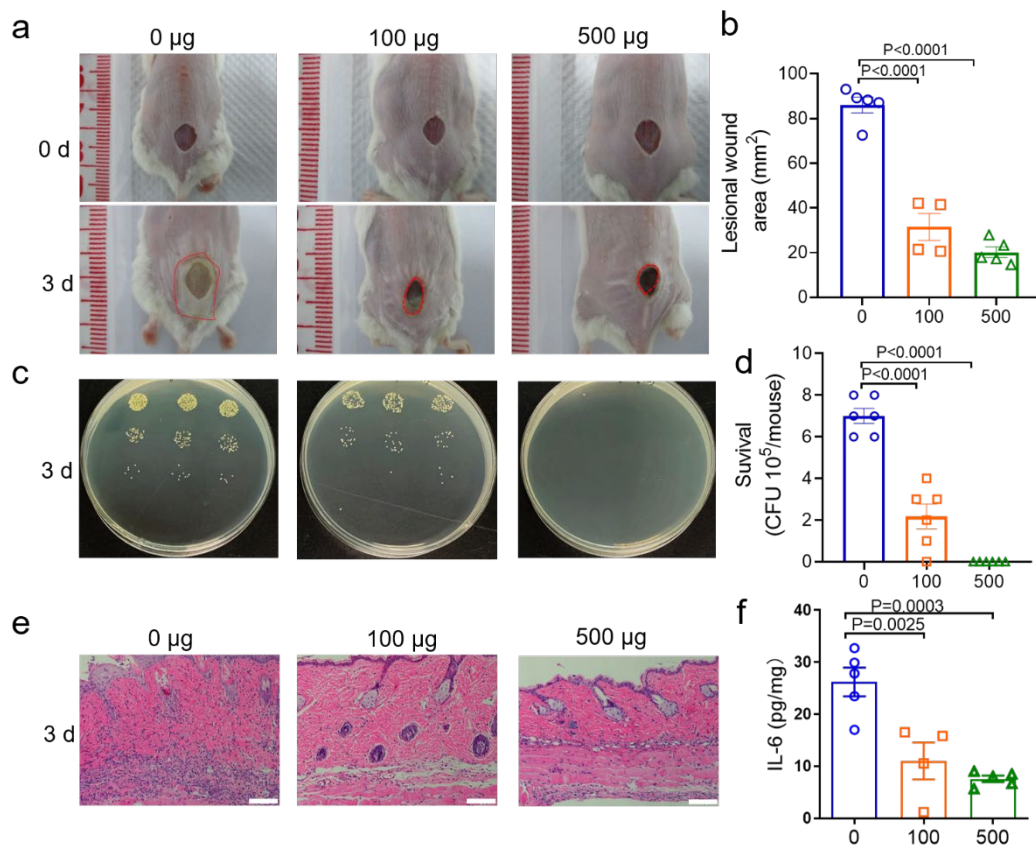

**Supplementary Fig. 21.** Nano-MgB<sub>2</sub> enhanced *S. aureus*-infected skin wound healing. **a**, Photographs of *S. aureus*-infected skin wounds topically treated with 100 µg and 500 µg/mouse Nano-MgB<sub>2</sub> for 3 days. **b**, The wound healing rate of mice treated as in **(a)** (n=5 biologically independent mice). **c**, **d**, The survival of *S. aureus* in *S. aureus*-infected skin wounds (n=6 biologically independent mice). **e**, The H&E staining of the infected wound areas (Scale bar=100 µm). **f**, The Inflammatory factor IL-6 protein expression in the lesional skins from mice treated as in **(a)** (n=5 biologically independent mice). Data are representative of at least three independent experiments with similar results. Values are the mean ± SEM, one-way ANOVA with Bonferroni post test was used to analyze multiple groups. Source data are provided as a Source Data file.

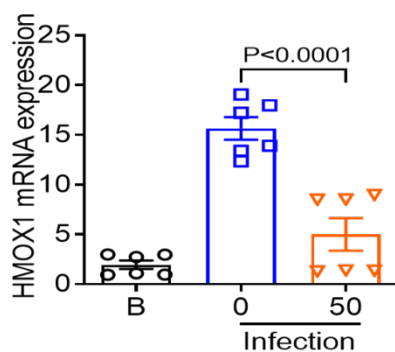

**Supplementary Fig. 22.** Nano-MgB<sub>2</sub> inhibited oxidative stress-related gene *hmx1* expression in

*P. aeruginosa*-infected skin wound (n=6 biologically independent mice). Data are representative of at least three independent experiments with similar results. Values are the mean  $\pm$  SEM, one-way ANOVA with Bonferroni post test was used to analyze multiple groups. Source data are provided as a Source Data file.

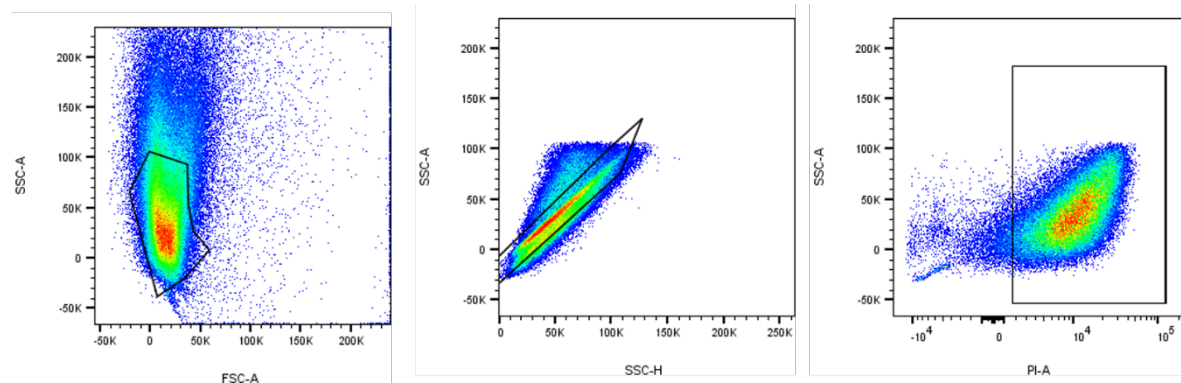

**Supplementary Fig. 23** Gating strategy for bacterial Flow Cytometry.

|            | MB NPs                                                                                                                                                                                                             | LPS-binding peptides                                                               | Metal nanomaterials             | 2D antibacterial materials                                                    |
|------------|--------------------------------------------------------------------------------------------------------------------------------------------------------------------------------------------------------------------|------------------------------------------------------------------------------------|---------------------------------|-------------------------------------------------------------------------------|
| Materials  | Nano-MgB <sub>2</sub><br>Nano-AlB <sub>2</sub><br>Nano-BeB <sub>2</sub>                                                                                                                                            | Cathelicidins                                                                      | Silver<br>MgO<br>ZnO            | BP<br>MoS <sub>2</sub><br>hBN                                                 |
| Structure  | Hydrolytic 2D materials                                                                                                                                                                                            | Peptide                                                                            | Low-dimensional materials       | 2D materials                                                                  |
| Function   | Anti-microbial<br>Anti-inflammation                                                                                                                                                                                | Anti-microbial<br>Anti-inflammation                                                | Anti-microbial                  | Anti-microbial                                                                |
| Mechanisms | (1) Trap LPS or PGN by forming stable borate ester bond<br>(2) Trap LPS or PGN to enhance the local cation concentration, leading to cell membrane damage<br>(3) Trap LPS or PGN to inhibit excessive inflammation | (1) Bind to LPS through electrostatic interaction, leading to cell membrane damage | ROS and Metal cation production | Cell membrane damage<br>Charge transfer<br>ROS production<br>Oxidative stress |

**Supplementary Table 1** The functional and mechanistic differences among MB NPs, LPS-binding peptides, Metal nanomaterials, and 2D antibacterial materials.

|                   |                         |
|-------------------|-------------------------|
| mGAPDH-F          | CTTAGCCCCCTGGCCAAG      |
| mGAPDH-R          | TGGTCATGAGCCCTTCCACA    |
| mTNF- $\alpha$ -F | TCAAGGACTCAAATGGGCTTTC  |
| mTNF- $\alpha$ -R | TGCAGAACTCAGGAATGGACAT  |
| mIL-6-F           | CTGCAAGAGACTTCCATCCAGTT |
| mIL-6-R           | GGGAAGGCCGTGGTTGTC      |
| mIL-1 $\beta$ -F  | TAACCTGTGGCCTTGG        |
| mIL-1 $\beta$ -R  | TGTGCTCTGCTTGTGAG       |
| mMCP-1-F          | CAGGTCCCTGTCATGCTTCT    |

|            |                      |
|------------|----------------------|
| mMCP-1-R   | GTGGGGCGTAACTGCATCT  |
| mHmox1-1-F | CAGAACCCAGTCTATGCCCC |
| mHmox1-1-R | GTGAGGCCCATACCAGAAGG |

**Supplementary Table 2** QPCR primers for mice.

|                                                   |                       |
|---------------------------------------------------|-----------------------|
| Pseudomonas aeruginosa<br>UCBPP-PA14 16S F (96bp) | TGCCTGGTAGTGGGGGATAA  |
| Pseudomonas aeruginosa<br>UCBPP-PA14 16S R(96bp)  | TCTGATAGCGTGAGGTCCGA  |
| gene-CIA_RS23525 F                                | GAAGAGCGGGAAATGTGGGA  |
| gene-CIA_RS23525 R                                | GGGGAAGATCACATAGGGCG  |
| gene-CIA_RS29995 F                                | ATCAGGAAGCCTGGCAGTTC  |
| gene-CIA_RS29995 R                                | GCTTGAAGGTCACCACCTGT  |
| gene-CIA_RS20225 F                                | AGTCCAAGGACGGCCTCTAT  |
| gene-CIA_RS20225 R                                | CATCAGCCAGGGTATCGACC  |
| gene-CIA_RS26230 F                                | ATCCACATCGACGGCATCAG  |
| gene-CIA_RS26230 R                                | ATACGGTGCACGTAGTCGTC  |
| gene-CIA_RS24915 F                                | AGATCGTCGACATCAAGGGC  |
| gene-CIA_RS24915 R                                | CAGGATCACGTCCGCTTCAA  |
| gene-CIA_RS33410 F                                | GACCGATCCGAAGGTCATCC  |
| gene-CIA_RS33410 R                                | ATCGAGCGCACGTGGATATT  |
| gene-CIA_RS35865 F                                | GTGATCGAGATCGCCGAAGT  |
| gene-CIA_RS35865 R                                | GGTAGTCGATCAGGCGGATG  |
| gene-CIA_RS36040 F                                | GCGACTTCACCATCAATGCC  |
| gene-CIA_RS36040 R                                | CGATTGCGGATGTGCGTGAAC |
| gene-CIA_RS20885 F                                | CACAGATCCTCGTCGCTACC  |
| gene-CIA_RS20885 R                                | TTCCAGGTCGTCCATGAAGC  |
| gene-CIA_RS33425 F                                | TCTTACGATTCTCGCCACGG  |
| gene-CIA_RS33425 R                                | TTGATGTTGATGGCCGGGAA  |
| gene-CIA_RS21575 F                                | CTGAACTTCATCCGCCAGGT  |
| gene-CIA_RS21575 R                                | CTGGAAGCGATTGAACAGCG  |
| gene-CIA_RS34960 F                                | CTGGAGAAGATCCACGACCG  |
| gene-CIA_RS34960 R                                | GAGGTGAAGTGGGTGTAGGC  |
| gene-CIA_RS29525 F                                | ATCCATGGCAACAAGAGCCA  |
| gene-CIA_RS29525 R                                | CATGGGGCAACTGGTCGATA  |
| gene-CIA_RS35975 F                                | CATCAAGCAGGACCGCTACA  |
| gene-CIA_RS35975 R                                | CAGGCCGAATACGTCCTTGA  |
| gene-CIA_RS08900 F                                | GTTAAGTTCGGCGATTCCGC  |
| gene-CIA_RS08900 R                                | ACGACTTGTCCAGAACCACG  |
| gene-CIA_RS34920 F                                | AGGGCATTTCGCTACAAGACC |
| gene-CIA_RS34920 R                                | GTCGAAGGACTCGATCTGGC  |

**Supplementary Table 3** QPCR primers for *Pseudomonas aeruginosa*.
