# Supplementary material
Source: PubMed Central journal article supplement (PMC9709058)
Supplement: 41467_2022_35050_MOESM2_ESM.pdf [file 41467_2022_35050_MOESM2_ESM.pdf]

## Reporting Summary

Nature Portfolio wishes to improve the reproducibility of the work that we publish. This form provides structure for consistency and transparency in reporting. For further information on Nature Portfolio policies, see our [Editorial Policies](#) and the [Editorial Policy Checklist](#).

### Statistics

For all statistical analyses, confirm that the following items are present in the figure legend, table legend, main text, or Methods section.

- |                                     |                                                                                                                                                                                                                                                                                                |
|-------------------------------------|------------------------------------------------------------------------------------------------------------------------------------------------------------------------------------------------------------------------------------------------------------------------------------------------|
| n/a                                 | Confirmed                                                                                                                                                                                                                                                                                      |
| <input type="checkbox"/>            | <input checked="" type="checkbox"/> The exact sample size ( $n$ ) for each experimental group/condition, given as a discrete number and unit of measurement                                                                                                                                    |
| <input type="checkbox"/>            | <input checked="" type="checkbox"/> A statement on whether measurements were taken from distinct samples or whether the same sample was measured repeatedly                                                                                                                                    |
| <input type="checkbox"/>            | <input checked="" type="checkbox"/> The statistical test(s) used AND whether they are one- or two-sided<br><i>Only common tests should be described solely by name; describe more complex techniques in the Methods section.</i>                                                               |
| <input type="checkbox"/>            | <input checked="" type="checkbox"/> A description of all covariates tested                                                                                                                                                                                                                     |
| <input type="checkbox"/>            | <input checked="" type="checkbox"/> A description of any assumptions or corrections, such as tests of normality and adjustment for multiple comparisons                                                                                                                                        |
| <input type="checkbox"/>            | <input checked="" type="checkbox"/> A full description of the statistical parameters including central tendency (e.g. means) or other basic estimates (e.g. regression coefficient) AND variation (e.g. standard deviation) or associated estimates of uncertainty (e.g. confidence intervals) |
| <input type="checkbox"/>            | <input checked="" type="checkbox"/> For null hypothesis testing, the test statistic (e.g. $F$ , $t$ , $r$ ) with confidence intervals, effect sizes, degrees of freedom and $P$ value noted<br><i>Give <math>P</math> values as exact values whenever suitable.</i>                            |
| <input checked="" type="checkbox"/> | <input type="checkbox"/> For Bayesian analysis, information on the choice of priors and Markov chain Monte Carlo settings                                                                                                                                                                      |
| <input type="checkbox"/>            | <input checked="" type="checkbox"/> For hierarchical and complex designs, identification of the appropriate level for tests and full reporting of outcomes                                                                                                                                     |
| <input checked="" type="checkbox"/> | <input type="checkbox"/> Estimates of effect sizes (e.g. Cohen's $d$ , Pearson's $r$ ), indicating how they were calculated                                                                                                                                                                    |

*Our web collection on [statistics for biologists](#) contains articles on many of the points above.*

### Software and code

Policy information about [availability of computer code](#)

Data collection

Data analysis

For manuscripts utilizing custom algorithms or software that are central to the research but not yet described in published literature, software must be made available to editors and reviewers. We strongly encourage code deposition in a community repository (e.g. GitHub). See the Nature Portfolio [guidelines for submitting code & software](#) for further information.

### Data

Policy information about [availability of data](#)

All manuscripts must include a [data availability statement](#). This statement should provide the following information, where applicable:

- Accession codes, unique identifiers, or web links for publicly available datasets
- A description of any restrictions on data availability
- For clinical datasets or third party data, please ensure that the statement adheres to our [policy](#)

The main data supporting the results in this study are available within the paper and its Supplementary Information. All data generated in this study are available from the corresponding authors.

## Field-specific reporting

Please select the one below that is the best fit for your research. If you are not sure, read the appropriate sections before making your selection.

Life sciences  Behavioural & social sciences  Ecological, evolutionary & environmental sciences

For a reference copy of the document with all sections, see [nature.com/documents/nr-reporting-summary-flat.pdf](https://www.nature.com/documents/nr-reporting-summary-flat.pdf)

## Life sciences study design

All studies must disclose on these points even when the disclosure is negative.

|                 |                                                                                                                                                                                                                                                                                                                                                                                   |
|-----------------|-----------------------------------------------------------------------------------------------------------------------------------------------------------------------------------------------------------------------------------------------------------------------------------------------------------------------------------------------------------------------------------|
| Sample size     | Sample sizes were determined on the basis of prior experimental work or a pilot study. No statistical calculations were made to determine sample size.                                                                                                                                                                                                                            |
| Data exclusions | All exclusion criteria were pre-established. For the in vivo studies, the criteria for exclusion were failure in administration, mistakes in tissue dissections, and health concerns unrelated to the procedure requiring euthanasia and exclusion.                                                                                                                               |
| Replication     | All experiments were carried out with at least 3 replicate samples for each experimental group. All data are representative of at least three independent experiments with similar results, which was described in corresponding figure legends.                                                                                                                                  |
| Randomization   | Samples were allocated into experimental groups at random.                                                                                                                                                                                                                                                                                                                        |
| Blinding        | The investigator was blinded to the group allocation during data collection such as in Flow-cytometry, Westernblot, Immuno-fluorescences, H&E staining and bacterial-killing experiments. For other experiments,blinding was not possible since the primary investigators performed the experiments from the beginning to the end due to the technical nature of the experiments. |

## Reporting for specific materials, systems and methods

We require information from authors about some types of materials, experimental systems and methods used in many studies. Here, indicate whether each material, system or method listed is relevant to your study. If you are not sure if a list item applies to your research, read the appropriate section before selecting a response.

### Materials & experimental systems

| n/a                                 | Involved in the study                                           |
|-------------------------------------|-----------------------------------------------------------------|
| <input type="checkbox"/>            | <input checked="" type="checkbox"/> Antibodies                  |
| <input type="checkbox"/>            | <input checked="" type="checkbox"/> Eukaryotic cell lines       |
| <input checked="" type="checkbox"/> | <input type="checkbox"/> Palaeontology and archaeology          |
| <input type="checkbox"/>            | <input checked="" type="checkbox"/> Animals and other organisms |
| <input checked="" type="checkbox"/> | <input type="checkbox"/> Human research participants            |
| <input checked="" type="checkbox"/> | <input type="checkbox"/> Clinical data                          |
| <input checked="" type="checkbox"/> | <input type="checkbox"/> Dual use research of concern           |

### Methods

| n/a                                 | Involved in the study                              |
|-------------------------------------|----------------------------------------------------|
| <input checked="" type="checkbox"/> | <input type="checkbox"/> ChIP-seq                  |
| <input type="checkbox"/>            | <input checked="" type="checkbox"/> Flow cytometry |
| <input checked="" type="checkbox"/> | <input type="checkbox"/> MRI-based neuroimaging    |

## Antibodies

|                 |                                                                                                                                                                                                                                                                                                                                                                                                                                                                                                                                                                                                                                                                                                                                                                                                                                                                                                                                                                                                                                                   |
|-----------------|---------------------------------------------------------------------------------------------------------------------------------------------------------------------------------------------------------------------------------------------------------------------------------------------------------------------------------------------------------------------------------------------------------------------------------------------------------------------------------------------------------------------------------------------------------------------------------------------------------------------------------------------------------------------------------------------------------------------------------------------------------------------------------------------------------------------------------------------------------------------------------------------------------------------------------------------------------------------------------------------------------------------------------------------------|
| Antibodies used | <ol style="list-style-type: none"> <li>MPO (Abcam, ab208670, Rabbit monoclonal, EPR20257,1:100) ;</li> <li>mF4/80 (Santacruz , sc-5266, Rat monoclonal antibody, BM8,1:50-1:500);</li> <li>Donkey anti-Rabbit IgG (H+L) Highly Cross-Adsorbed Secondary Antibody, Alexa Fluor™ 594, ThermoFisher scientific, A-21207, 1:500;</li> <li>Donkey anti-Rat IgG (H+L) Highly Cross-Adsorbed Secondary Antibody, Alexa Fluor™ 488, ThermoFisher scientific, A-21208, 1:500</li> <li>P38 antibody (Abways, Cat:CY5488, Rabbit IgG, 9E1,1:1000);</li> <li>Pp38 antibody (Abways, Cat:CY6391, Rabbit IgG, rabbit polyclonal antibody,1:1000);</li> <li>ERK1/2 antibody (Abways, Cat:CY5487, Rabbit IgG, 9D12,1:1000);</li> <li>pErk1/2 antibody (Abways, Cat:CY5277, Rabbit IgG, 5B7,1:1000);</li> <li>JNK1/2/3 antibody (Abways, Cat:CY5490, Rabbit IgG, 9E3,1:1000);</li> <li>pJNK1/2/3 antibody (Abways, Cat:CY5541, Rabbit IgG, 11C3,1:1000);</li> <li>GAPDH (Abways, Cat:AB0037, Rabbit IgG, 11B7,1:5000);</li> </ol>                                  |
| Validation      | <ol style="list-style-type: none"> <li>MPO:<a href="https://www.abcam.com/myeloperoxidase-antibody-epr20257-ab208670.html">https://www.abcam.com/myeloperoxidase-antibody-epr20257-ab208670.html</a></li> <li>F4/80:<a href="https://www.scbt.com/p/f4-80-antibody-bm8?requestFrom=search">https://www.scbt.com/p/f4-80-antibody-bm8?requestFrom=search</a></li> <li>Donkey anti-Rabbit IgG (H+L) <a href="https://www.thermofisher.com/cn/zh/antibody/product/Donkey-anti-Rabbit-IgG-H-L-Highly-Cross-Adsorbed-Secondary-Antibody-Polyclonal/A-21207">https://www.thermofisher.com/cn/zh/antibody/product/Donkey-anti-Rabbit-IgG-H-L-Highly-Cross-Adsorbed-Secondary-Antibody-Polyclonal/A-21207</a></li> <li>Donkey anti-Rat IgG (H+L) <a href="https://www.thermofisher.com/cn/zh/antibody/product/Donkey-anti-Rat-IgG-H-L-Highly-Cross-Adsorbed-Secondary-Antibody-Polyclonal/A-21208">https://www.thermofisher.com/cn/zh/antibody/product/Donkey-anti-Rat-IgG-H-L-Highly-Cross-Adsorbed-Secondary-Antibody-Polyclonal/A-21208</a></li> </ol> |

Secondary-Antibody-Polyclonal/A-21208  
 5.p38:http://abways.com/showproduct.asp?cid=CY5488 p38 MAPK Antibody  
 6.Pp38:http://abways.com/showproduct.asp?cid=CY6391 Phospho-p38 MAPK (Thr180/Tyr182) Antibody  
 7.ERK:http://abways.com/showproduct.asp?cid=CY5487 ERK1/2 Antibody  
 8.PErk:http://abways.com/showproduct.asp?cid=CY5277 Phospho-Erk1 (T202/Y204) + Erk2 (T185/Y187) Antibody  
 9.JNK :http://abways.com/showproduct.asp?cid=CY5490 JNK1/2/3 Antibody  
 10.PJNK:http://abways.com/showproduct.asp?cid=CY5541 Phospho-JNK1/2/3 (T183+T183+T221) Antibody  
 11.GAPDH:http://abways.com/showproduct.asp?cid=AB0037 GAPDH Antibody

## Eukaryotic cell lines

Policy information about [cell lines](#)

|                                                                      |                                                                                           |
|----------------------------------------------------------------------|-------------------------------------------------------------------------------------------|
| Cell line source(s)                                                  | HaCaT and Raw264.7 cell lines were purchased from Procell Life Science&technology Co.,Ltd |
| Authentication                                                       | The cell lines were authenticated by the company using STR profiling.                     |
| Mycoplasma contamination                                             | All the cells were tested and were not contaminated by mycoplasma.                        |
| Commonly misidentified lines<br>(See <a href="#">ICLAC</a> register) | No commonly misidentified cell lines were used.                                           |

## Animals and other organisms

Policy information about [studies involving animals](#); [ARRIVE guidelines](#) recommended for reporting animal research

|                         |                                                                                                                                          |
|-------------------------|------------------------------------------------------------------------------------------------------------------------------------------|
| Laboratory animals      | Balb/c mice (7-8 weeks, male) were purchased from Charles River (CHINA Inc). House condition information was provided in the manuscript. |
| Wild animals            | The study did not involve wild animals.                                                                                                  |
| Field-collected samples | The study did not involve samples collected from the field.                                                                              |
| Ethics oversight        | The protocol was approved by East China Normal University Animal Care and Use Committee.                                                 |

Note that full information on the approval of the study protocol must also be provided in the manuscript.

## Flow Cytometry

### Plots

Confirm that:

- The axis labels state the marker and fluorochrome used (e.g. CD4-FITC).
- The axis scales are clearly visible. Include numbers along axes only for bottom left plot of group (a 'group' is an analysis of identical markers).
- All plots are contour plots with outliers or pseudocolor plots.
- A numerical value for number of cells or percentage (with statistics) is provided.

### Methodology

|                           |                                                                                                                                                                                                                                                                                                                                                                                                                                                                                                                                                                                                                                                                                                                                                                                |
|---------------------------|--------------------------------------------------------------------------------------------------------------------------------------------------------------------------------------------------------------------------------------------------------------------------------------------------------------------------------------------------------------------------------------------------------------------------------------------------------------------------------------------------------------------------------------------------------------------------------------------------------------------------------------------------------------------------------------------------------------------------------------------------------------------------------|
| Sample preparation        | 1.For the live and dead bacteria detection, <i>P. aeruginosa</i> (108/mL) treated with 272 $\mu$ M Nano-MgB2 (12.5 $\mu$ g/mL) and 544 $\mu$ M H3BO3+Mg2+ for 3 h were added with 15 $\mu$ M Propidium iodide and incubated for 30 min in the dark.For <i>S. aureus</i> , <i>S. aureus</i> (1 $\times$ 108/mL) were incubated with 10.88mM Nano-MgB2 (500 $\mu$ g/mL) or 21.76 mM H3BO3+Mg2+ for 3h and then incubated with 15 $\mu$ M Propidium iodide for 30 min in the dark.<br>2.For the bacteria cytoplasmic membrane depolarization assay , bacteria were suspended by a final concentration of 2 $\mu$ M DiSC3(5) and incubated for 30 min. The change in fluorescence was measured immediately after the addition of 272 $\mu$ M Nano-MgB2 and 544 $\mu$ M H3BO3+Mg2+. |
| Instrument                | FACScan (BD LSRFortessa X-20),FACScan (Beckman Coulter)                                                                                                                                                                                                                                                                                                                                                                                                                                                                                                                                                                                                                                                                                                                        |
| Software                  | Data were collected with CytExpert software 2.4 and analyzed with FlowJo_V10 software.                                                                                                                                                                                                                                                                                                                                                                                                                                                                                                                                                                                                                                                                                         |
| Cell population abundance | 100,000 bacteria were acquired from the first gate with gate strategy of Forward Scatter Area (FSA) and Side Scatter Area (SSA) and more than 95% were involved in the following date analysis.                                                                                                                                                                                                                                                                                                                                                                                                                                                                                                                                                                                |
| Gating strategy           | 1.Bacterial Live and dead gating strategy: Using Forward Scatter Area (FSA) and Side Scatter Area (SSA) to find the main group of bacteria; Using SSA and Side Scatter SSH( Side Scatter High) to remove adherent bacterial populations; Using SSH and PE to display the positive cell population of dead bacteria.                                                                                                                                                                                                                                                                                                                                                                                                                                                            |

2. Bacterial cytoplasmic membrane depolarization assay gating strategy: Using Forward Scatter Area (FSA) and Side Scatter Area (SSA) to find the main group of bacteria; Using SSA and Side Scatter SSH (Side Scatter High) to remove adherent bacterial populations, bacteria cell membrane potential was shown in Histogram form.

Tick this box to confirm that a figure exemplifying the gating strategy is provided in the Supplementary Information.
